# Supplementary material for: Foxtail Millet Improves Blood Glucose Metabolism in Diabetic Rats through PI3K/AKT and NF-κB Signaling Pathways Mediated by Gut Microbiota
Source: MDPI journal article supplement (doi:10.3390/nu13061837), 2021-05-27
Supplement: s1 [file s1]

**Table S1.** Composition and energy ratio of experimental diets.

| Ingredient (g/100g)        | control diet | High-fat diet | 20% foxtail millet diet |
|----------------------------|--------------|---------------|-------------------------|
| Foxtail Millet             | -            | -             | 20.00                   |
| Casein                     | 18.96        | 25.85         | 23.85                   |
| L-Cystine                  | 0.28         | 0.39          | 0.39                    |
| Corn Starch                | 47.98        | -             | -                       |
| Maltodextrin               | 11.85        | 16.15         | 8.15                    |
| Sucrose                    | 6.52         | 8.89          | 3.89                    |
| Cellulose                  | 4.74         | 6.46          | 2.46                    |
| Soybean Oil                | 2.37         | 3.23          | 3.23                    |
| Lard                       | 1.90         | 31.66         | 30.66                   |
| Mineral Mix M1002          | 0.95         | 1.29          | 1.29                    |
| DiCalcium Phosphate        | 1.23         | 1.68          | 1.68                    |
| Calcium Carbonate          | 0.52         | 0.71          | 0.71                    |
| Potassium Citrate          | 1.56         | 2.13          | 2.13                    |
| Vitamin Mix V1001          | 0.95         | 1.29          | 1.29                    |
| Choline Bitartrate         | 0.19         | 0.26          | 0.26                    |
| <b>Energy Ratio</b>        |              |               |                         |
| % Energy from protein      | 20           | 20            | 20                      |
| % Energy from fat          | 10           | 60            | 60                      |
| % Energy from carbohydrate | 70           | 20            | 20                      |

To guarantee consistent energy ratios among 20% FM and high-fat diets, the content of casein, maltodextrin, sucrose, cellulose, and lard were reduced accordingly in the 20% FM diet.

**Table S2.** Primers for PCR.

| Name             | Sequence (5'-3')          | Length |
|------------------|---------------------------|--------|
| IL-6-F           | GAAATACAAAGAAATGATGG      | 20     |
| IL-6-R           | GTGTTTCAACATTCATATTGC     | 21     |
| TNF- $\alpha$ -F | TACTGAACTTCGGGGTGATTGGTCC | 25     |
| TNF- $\alpha$ -R | CAGCCTTGTCCTTGAAGAGAACC   | 24     |
| IRS2-F           | CCACCTTCTCTGGCAGTTCAG     | 21     |
| IRS2-R           | AAGGGTTGTAGGCCACTTTGG     | 21     |
| PI3K(p110)-F     | GGAGGCTGAATCTCTTGACCTG    | 22     |
| PI3K(p110)-R     | TTACCCACCGTGCTCTGCTG      | 20     |
| AKT-F            | GTTCTCCTACTCAGCCAGTG      | 20     |
| AKT-R            | CCATCAGTGACAGATGATCC      | 20     |
| GK-F             | GTGGTGCTTTTGAGACCCGTT     | 21     |
| GK-R             | TTCGATGAAGGTGTATTCGCA     | 21     |
| G6P-F            | TTTATCCTACCATCAGGTGGCTGT  | 24     |
| G6P-R            | GGGTGACAGATACTTCGCTAGTTG  | 24     |
| PEPCK-F          | ACTGAGCAGCCCCTTGAGACA     | 20     |
| PEPCK-R          | GAGGGCGTGAAGTAC           | 18     |

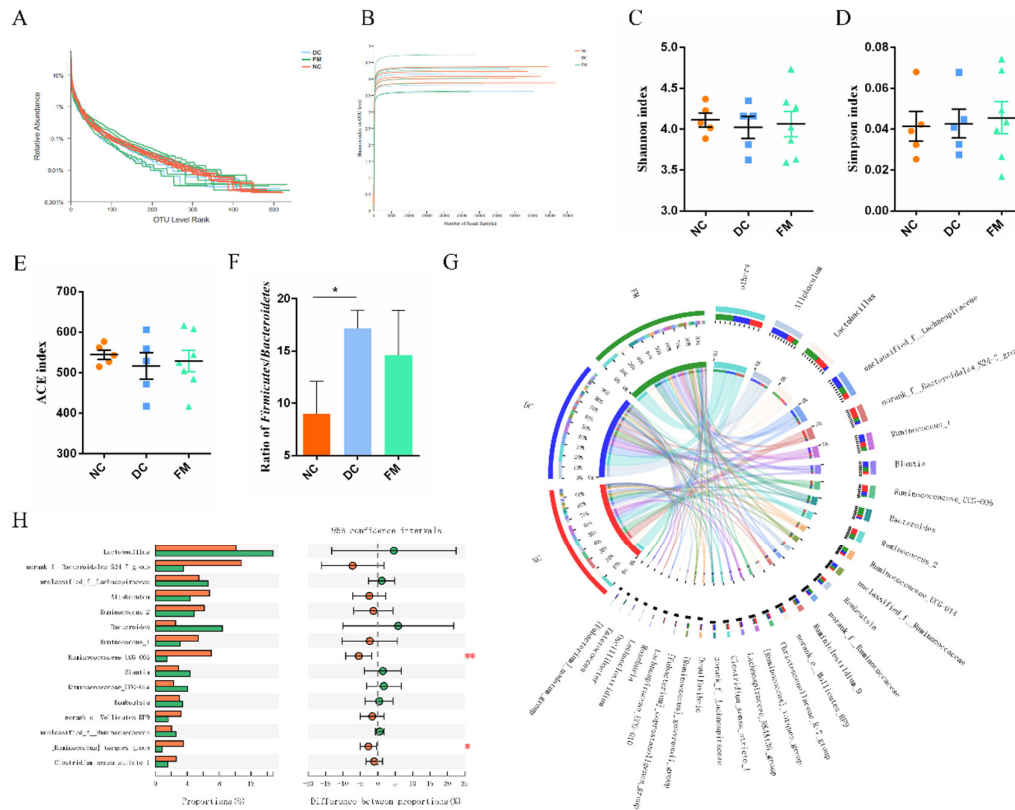

**Figure S1.** Changes in the structure and composition of gut microbiota: (A) the rarefaction curve; (B) the Shannon curve; (C–E) the richness (ACE) and  $\alpha$ -diversity (Shannon and Simpson) of the gut microbiota among different groups; (F) the ratio of *Firmicutes/Bacteroidetes*; (G) Circos diagram of bacterial communities with relative abundance higher than 1% at the genus level; (H) mean proportions of top 15 key genera between NC and FM groups. Data were represented as mean  $\pm$  SEM. NC, normal control group (n=5); DC, diabetic control group (n=5); FM, foxtail millet supplementation group (n=7). Differences between two groups were compared using Student's *t*-test, \**p* < 0.05, \*\**p* < 0.01.
